# Supplementary material
Source: Springer Nature journal article supplement (https://www.springermedizin.de/resource/supplementary/12933_2013_778_MOESM2_ESM.pdf/9539208)
Supplement: MOESM2 [file 9539208]

## Additional Figure 1

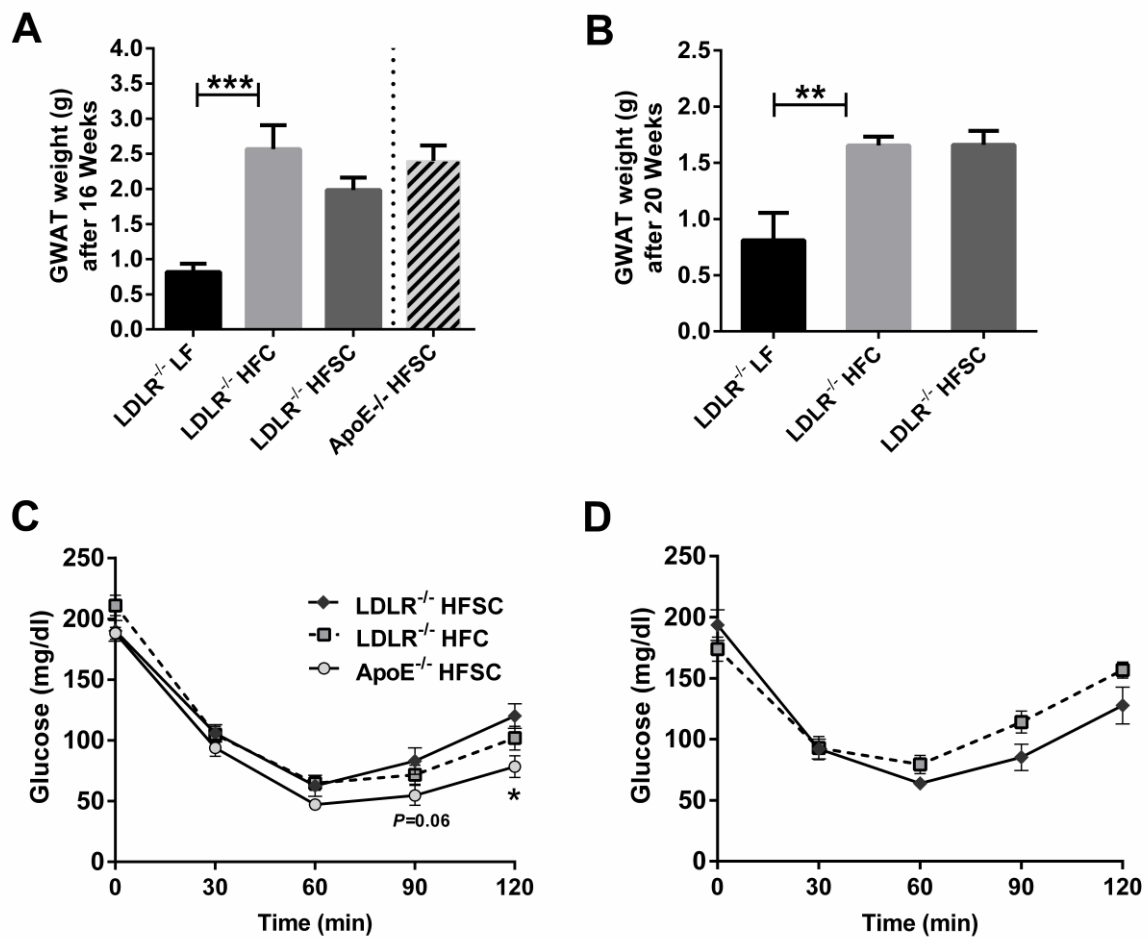

**Additional Figure 1:** LDLR<sup>-/-</sup> mice were placed on LF control or two different high-fat diets both containing 0.15% cholesterol with (HFSC) or without sucrose enrichment (HFC). ApoE<sup>-/-</sup> mice were fed HFSC. Mean gonadal adipose tissue (GWAT) weight after dietary treatment for 16 and 20 weeks (A,B). Insulin tolerance test was performed by intraperitoneal injection of 0.75 g insulin/kg body weight after 12 and 20 weeks of feeding. Asterisk indicates significant difference between ApoE<sup>-/-</sup> and LDLR<sup>-/-</sup> mice on HFSC (n = 8 animals per group) (C,D). For statistical analysis LDLR<sup>-/-</sup> mice fed HFSC or LF were compared with HFC-fed LDLR<sup>-/-</sup> mice. In addition, LDLR<sup>-/-</sup> and ApoE<sup>-/-</sup> mice both fed HFSC were compared. All data represent mean ± SEM. \*P<0.05, \*\*P<0.01, \*\*\*P<0.001
